# Supplementary material for: Saccharomyces cerevisiae Mus81-Mms4 prevents accelerated senescence in telomerase-deficient cells
Source: PLoS Genet. 2020 May 29;16(5):e1008816. doi: 10.1371/journal.pgen.1008816 (PMC7286520; doi:10.1371/journal.pgen.1008816)
Supplement: S2 Data — (XLSX) [file pgen.1008816.s011.xlsx]

## Sheet: Sup Fig S1, C
Quantification of cell division (doublings)
Wild type
Replicate 1		Replicate 2		Replicate 3
Generations	Number of cell divisions	Generations	Number of cell divisions	Generations	Number of cell divisions	Average generations	STDEV	Average number of cell divisions	STDEV
25.9115	10.8136	25.1634	10.4198	25.3183	10.7268	25.4644	0.394876	10.6534	0.206909
36.7251	7.64961	35.5832	7.16279	36.0451	7.35562	36.1178	0.574423	7.38934	0.245159
44.3747	7.611	42.746	7.29216	43.4007	7.45332	43.5071	0.819574	7.45216	0.159422
51.9857	7.70712	50.0381	7.1056	50.854	7.51056	50.9593	0.978051	7.44109	0.306715
59.6928	7.53132	57.1437	6.98355	58.3646	7.56986	58.4004	1.27493	7.36158	0.327944
67.2241	7.63159	64.1273	7.07001	65.9344	7.46782	65.762	1.55562	7.38981	0.288802
74.8557	7.83273	71.1973	7.16114	73.4023	7.34904	73.1518	1.84204	7.44764	0.346479
82.6885	7.67072	78.3584	7.14856	80.7513	7.58317	80.5994	2.16901	7.46748	0.279644
90.3592	7.81217	85.507	7.71405	88.3345	5.99156	88.0669	2.43714	7.17259	1.02398
98.1713		93.221	6.72231	94.326	8.13486	95.2395	2.59849	7.42858	0.99882
		99.9433		102.461
est2∆
Replicate 1		Replicate 2		Replicate 3
Generations	Number of cell divisions	Generations	Number of cell divisions	Generations	Number of cell divisions	Average generations	STDEV	Average number of cell divisions	STDEV
25.3981	10.3362	24.6847	10.0083	25.0515	10.0656	25.0448	0.356747	10.1367	0.175125
35.7343	6.33798	34.693	5.50505	35.1171	6.25038	35.1815	0.523609	6.03114	0.457703
42.0722	4.99051	40.198	4.44213	41.3675	4.46802	41.2126	0.946652	4.63355	0.309402
47.0628	4.95237	44.6402	6.2063	45.8355	6.68641	45.8461	1.21132	5.94836	0.895332
52.0151	8.93765	50.8465	8.81411	52.5219	7.79879	51.7945	0.85923	8.51685	0.624919
60.9528	8.53716	59.6606	6.55115	60.3207	9.11226	60.3114	0.646143	8.06686	1.34377
69.4899	7.2605	66.2117	6.47405	69.433	6.37331	68.3782	1.87644	6.70262	0.485756
76.7504	7.29321	72.6858	6.98609	75.8063	7.23539	75.0808	2.12721	7.17156	0.163203
84.0436	7.44175	79.6719	7.08282	83.0417	7.12969	82.2524	2.29026	7.21809	0.195112
91.4854	7.47478	86.7547	7.03968	90.1714	7.30561	89.4705	2.44198	7.27336	0.219339
98.9602	7.07548	93.7944	6.75899	97.477	7.30561	96.7438	2.65979	7.0467	0.274444
106.036		100.553
est2∆ mus81∆
Replicate 1		Replicate 2		Replicate 3		Replicate 4
Generations	Number of cell divisions	Generations	Number of cell divisions	Generations	Number of cell divisions	Generations	Number of cell divisions	Average generations	STDEV	Average number of cell divisions	STDEV
25.2034	9.99686	24.5262	9.54733	24.5193	9.13415	24.6805	9.77587	24.7324	0.322753	9.61355	0.36855
35.2003	6.09837	34.0735	4.37546	33.6534	4.85332	34.4564	5.7703	34.3459	0.657245	5.27436	0.797967
41.2987	3.88362	38.449	4.8983	38.5067	4.66482	40.2267	2.69258	39.6203	1.39004	4.03483	0.99448
45.1823	4.7028	43.3473	4.16924	43.1716	5.18832	42.9193	4.4208	43.6551	1.03317	4.62029	0.436924
49.8851	4.86683	47.5165	7.45858	48.3599	8.26772	47.3401	3.62966	48.2754	1.16175	6.0557	2.17257
54.7519	8.96804	54.9751	8.1629	56.6276	6.88085	50.9697	12.8999	54.3311	2.39196	9.22793	2.59449
63.72	7.1911	63.138	6.68791	63.5085	6.86751	63.8697	6.95345	63.559	0.317395	6.92499	0.209073
70.911	7.22408	69.8259	6.76063	70.376	6.37502	70.8231	6.42587	70.484	0.497371	6.6964	0.391168
78.1351	7.51475	76.5865	6.7439	76.751	6.719	77.249	7.14846	77.1804	0.69601	7.03153	0.377528
85.6499	7.23549	83.3304	6.51469	83.47	10.3244	84.3974	7.15984	84.2119	1.06921	7.8086	1.7081
92.8854	7.20878	89.8451	6.72022	93.7944	3.07968	91.5573	6.96463	92.0205	1.71673	5.99333	1.95265
100.094		96.5653		96.8741		98.5219

## Sheet: Sup Fig S4, A-C
Supplemental Figure S4, A
		Est2		est2
		Mus81-Myc	mus81-dd-Myc	Mus81	mus81-dd	rad51 mus81-dd-Myc	rad51 Mus81-Myc
	Replicate 1	1.1355	1.23114	2.25012	1.16743	1.59475	0.928731
	Replicate 2	1.71713	1.36289	1.17827	1.27751	1.32869	1.25411
	Replicate 3					1.17555	1.3566
	Average	1.42632	1.29702	1.71419	1.22247	1.36633	1.17982
	SEM	0.290813	0.0658716	0.535925	0.0550405	0.122469	0.128982
Supplemental Figure S4, B
		est2Δ rad51Δ MUS81-MYC	est2Δ rad51Δ mus81-DD-MYC	est2Δ rad59Δ MUS81-MYC	est2Δ rad59Δ mus81-DD-MYC
	Replicate 1	2.14355	0.97716	2.70507	2.09943
	Replicate 2	1.71713	1.34723	1.75321	2.34026
	Replicate 3	1.66248	2.8481	2.46514	2.32947
	Average	1.84105	1.72416	2.30781	2.25639
	SEM	0.152069	0.572032	0.285817	0.0785379
	P-value		0.8512		0.8732
Supplemental Figure S4, C
		est2Δ MCM4-MYC	MCM4-MYC	est2Δ ESC4-MYC	ESC4-MYC	est2Δ POL32-MYC	POL23-MYC
	Replicate 1	2.76702	2.15348	2.79594	1.44727	1.88775	1.93634
	Replicate 2	1.33484	1.18509	3.22657	1.67404	3.00355	1.07923
	Replicate 3	1.6529	1.22972	3.89962	1.83189	3.49026	1.38511
	Average	1.91825	1.52276	3.30738	1.65107	2.79385	1.46689
	SEM	0.434202	0.315619	0.321157	0.111623	0.474337	0.250784
	P-value		0.500379		0.00822		0.068947

## Sheet: Sup Fig S5, C
Viability data with Rrm3 and Mus81
		Wild type (WT)
	MMS%	Replicate 1	Replicate 2	Replicate 3	Replicate 4	Replicate 5	Replicate 6	Replicate 7
	0	100
	0.0025	98.3	98.8	90
	0.005	88.5	90.4	98	99.7	84.2	89.6	95.4
	0.0075	99.5	97.1	92	99.2	100	90	88.1
	0.01	90	80.3	92.6	89.4	87.3	93.8	93.5
	0.02	85.4	91.9	83.8	91.5
	0.03	66.2	75.1	58.3
		rrm3Δ
	MMS%	Replicate 1	Replicate 2	Replicate 3	Replicate 4	Replicate 5	Replicate 6	Replicate 7
	0	100
	0.0025	98	99	100
	0.005	96.4	95.2	100	92.9	100	89.1	93.9
	0.0075	95.2	95.4	89.2	90	90.6	89.5	93.2
	0.01	88.2	76.1	81.1	88.3	76.6
	0.02	82.1	81.7	78.1	78.9	84.5
	0.03
		mus81Δ
	MMS%	Replicate 1	Replicate 2	Replicate 3	Replicate 4	Replicate 5	Replicate 6	Replicate 7	Replicate 8
	0	100
	0.0025	91.2	90.3	92.3
	0.005	84.2	78.8	90.4	79.3	80.1	86.2	73.4	74
	0.0075	65.8	67.6	66.9	59.1	62.6
	0.01	60.5	33.5	36.8	46.9	55.9	50.8
	0.02	3.6	0.6	0.9	0.4	0.8	1.2
	0.03	0
		rrm3Δ mus81Δ
	MMS%	Replicate 1	Replicate 2	Replicate 3	Replicate 4	Replicate 5	Replicate 6
	0	100
	0.0025	70	80.2	63.3	72.6	72.2	82.8
	0.005	58.9	58.9	58.9	67.5	67.5	67.5
	0.0075	21.7	24.4	36.7	24.8	28	42
	0.01	4.4	6.7	6.1	5.1	7	7.6
	0.02	0
	0.03	0
		WT		rrm3Δ		mus81Δ		rrm3Δ mus81Δ
	MMS%	Average viability	STDEV	Average viability	STDEV	Average viability	STDEV	Average viability	STDEV
	0	100		100		100		100
	0.0025	95.7	4.94267	99	1	91.2667	1.00167	73.5167	1.00167
	0.005	92.2571	5.5946	95.3571	3.90592	80.8	5.86296	63.2	5.86296
	0.0075	95.1286	4.97986	91.8714	2.68248	64.4	3.52775	29.6	3.52775
	0.01	89.5571	4.72259	82.06	5.97687	47.4	10.5947	6.15	10.5947
	0.02	88.15	4.15411	81.06	2.58612	1.25	1.18279	0	1.18279
	0.03	66.5333	8.40496

## Sheet: Sup Fig S5, F 
Quantification of TG tract between two Y' elements
	Replicate 1	Replicate 2	Replicate 3	Replicate 4	Average	SEM	P-value
Wild typo (WT)	0.00170781	0.00326985			0.00248883	0.000781019
mus81Δ	0.0017764	0.000923946			0.00135017	0.000426228
rrm3Δ	0.00834782	0.00508428	0.00420593		0.00587934	0.00126001
mus81Δ rrm3Δ	0.00444789	0.0049542	0.00462727	0.00478313	0.00470312	0.000108143	0.4505	compared to rrm3

## Sheet: Fig 4, B
Comparing viability ratios
			Methyl methanesulfonate (MMS)
		Replicate	.0.001%	2.5e-05	5e-05	0.0001	0.0002	0.0003
	Wild type (WT)	1	1.36808	0.879479	1.14332	0.947883	1.0456	0.899023
		2	1.11455	0.780186	0.873065	1.03096	0.928793	0.882353
		3	0.986523	0.913747	0.873315	0.889488	0.889488	0.719677
		4	0.873288	1.08904	1.08904	1.00685	1.04795	0.85274
		5	0.916107	1.19799	1.01678	0.83557	1.17785	0.875839
		6	0.92236	0.773292	0.670807	0.829193	0.810559	0.829193
	Average		1.03015	0.938955	0.944388	0.923324	0.983373	0.843137
	SEM		0.0758183	0.0698684	0.0708812	0.0350577	0.0540131	0.0266206
	mus81-del	1	1	1.14815	0.925926	0.246914	0
		2	1.11357	0.930748	0.905817	0.182825	0.00831025
		3	0.891892	0.942568	0.942568	0.263514	0.0101351
		4	0.764479	1.10039	0.996139	0.335907	0
		5	0.863777	0.817337	0.678019	0.250774	0.0185759
		6	0.9375	1.23355	0.740132	0.217105	0
	Average		0.928537	1.02879	0.864767	0.249507	0.00617021
	SEM		0.0489481	0.0640466	0.0513634	0.020949	0.00310062
	est2-del	1	1.06034	1.14828	0.956897	1.01897	0.894828	0.465517
		2	3.08333	3.33333	1.41667	1	1.5	0.666667
		3	1.3125	1.07386	0.835227	1.19318	0.784091	0.409091
		4	1.28253	1.75093	1.15985	1.07063	0.858736	0.457249
		5	1.26316	1.47368	1.42105	1.21053	0.684211	0.368421
		6	1.84286	2.22857	1.84286	1.45714	0.557143	0.342857
	Average		1.64079	1.83478	1.27209	1.15841	0.879835	0.451634
	SEM		0.307539	0.345853	0.149629	0.0696204	0.133771	0.0472687
	mus81-del est2-del	1	1.72105	0.852632	0.0947368	0.0157895	0
		2	1.23077	0.692308	0.153846	0.0769231	0
		3	1.35577	1.52885	0	0.0576923	0.0288462
		4	2.22727	0.863636	0.181818	0	0
		5	1.33051	0.822034	0.194915	0.0254237	0.00847458
		6	1.72189	0.497041	0.12426	0.0177515	0.0177515
	Average		1.59788	0.876083	0.124929	0.0322633	0.0091787
	SEM		0.151829	0.142264	0.029149	0.0118474	0.00487696
			Hydroxyurea (HU)
		Replicate	5 mM	10 mM	20 mM	30 mM	40 mM
	Wild type (WT)	1	1.08469	1.25081	1.0456	0.820847	0.781759
		2	0.956656	1.17028	0.817337	0.882353	1.10526
		3	0.962264	0.784367	0.978437	0.743935	1.06739
		4	1.25342	0.893836	1.13014	1.00685	1.05822
		5	1.10738	0.765101	0.926174	0.855705	1.00671
		6	0.968944	0.968944	0.996894	0.931677	0.950311
	Average		1.05556	0.972223	0.98243	0.873561	0.994941
	SEM		0.0478445	0.081891	0.0433795	0.037023	0.0479584
	mus81-del	1	1.03704	0.975309	0.938272	0.864198	0.777778
		2	0.963989	0.972299	1.07202	0.914127	1.0554
		3	1.24662	0.780405	0.881757	0.922297	0.952703
		4	1.07722		0.96139	0.752896	1.00772
		5	0.900929	0.826625	0.835913	0.76161	0.770898
		6	0.9375	0.957237	0.947368	0.858553	0.789474
	Average		1.02722	0.902375	0.939454	0.845613	0.892329
	SEM		0.0512285	0.0411297	0.0327461	0.0298555	0.0522813
	est2-del	1	0.962069	1.03966	1.05517	0.87931	1.06552
		2	3.33333	2.5	2.16667	3.25	2.08333
		3	1.67045	1.44886	1.38068	1.6875	1.48295
		4	1.32714	1.47212	1.26022	1.20446	1.71747
		5	2.57895	3	2.21053	1.42105	1.42105
		6	2.44286	1.58571	2.91429	1.88571	1.84286
	Average		2.05247	1.84106	1.83126	1.72134	1.6022
	SEM		0.361995	0.304123	0.292159	0.338197	0.145803
	mus81-del est2-del	1	1.57895		0.710526	0.426316	0.205263
		2	3.07692	1.84615	1.23077	0.307692	0
		3	1.58654	1.26923	0.403846		0.144231
		4	2.36364	2.54545	0.863636	0.590909	0.136364
		5	1.07627	1.02542	0.79661	0.389831	0.161017
		6	1.72189	1.1716	0.781065	0.47929	0.035503
	Average		1.9007	1.57157	0.797742	0.438808	0.11373
	SEM		0.289349	0.280492	0.108765	0.0471803	0.032203

## Sheet: Fig 5, B
Mus81 Chromatin Immunoprecipitation
		Est2		est2
		Mus81-Myc	mus81-DD-Myc	Mus81-Myc	mus81-DD-Myc	Mus81	mus81-dd
	Replicate 1	1.1355	1.23114	8.04634	7.38706	2.25012	1.16743
	Replicate 2	1.71713	1.36289	5.50217	8.68384	1.17827	1.27751
	Replicate 3			8	6.60397
	Replicate 4			8.3301	4.76783
	Average	1.42632	1.29702	7.46965	6.86068	1.71419	1.22247
	SEM	0.290813	0.0658716	0.659874	0.818887	0.535925	0.0550405
	P-value			0.00386112	0.0106015
